# Supplementary material for: Link between serum lipid signature and prognostic factors in COVID-19 patients
Source: PubMed Central journal article supplement (PMC8568966; doi:10.1038/s41598-021-00755-z), 2021-11-04
Supplement: 41598_2021_755_MOESM1_ESM.pdf [file 41598_2021_755_MOESM1_ESM.pdf]

## Supplementary materials.

### Link between serum lipid signature and prognostic factors in COVID-19 patients

Running title: Serum lipidome in COVID-19 patients

Michele Dei Cas<sup>1#</sup>, Sara Ottolenghi<sup>1#</sup>, Camillo Morano<sup>2</sup>, Rocco Rinaldo<sup>1,3</sup>, Gabriella Roda<sup>2</sup>, Davide Chiumello<sup>1,4</sup>, Stefano Centanni<sup>1,3</sup>, Michele Samaja<sup>1\*</sup>, Rita Paroni<sup>1\*</sup>

<sup>1</sup> Department of Health Sciences, Università degli Studi di Milano, Milan, Italy

<sup>2</sup> Department of Pharmaceutical Sciences, Università degli Studi di Milano, Milan, Italy

<sup>3</sup> Respiratory Unit, San Paolo University Hospital, ASST Santi Paolo e Carlo, Milan, Italy

<sup>4</sup> Department of Anesthesia and Intensive Care, San Paolo University Hospital, ASST Santi Paolo e Carlo, Milan, Italy.

# the authors contribute equally to this study

\*co-senior authors

\*Corresponding authors: Rita Paroni, Associate Professor in Clinical biochemistry, [rita.paroni@unimi.it](mailto:rita.paroni@unimi.it), +390250323272, Department of Health Sciences, Università degli Studi di Milano, via A.di Rudini 8, Milan, Italy

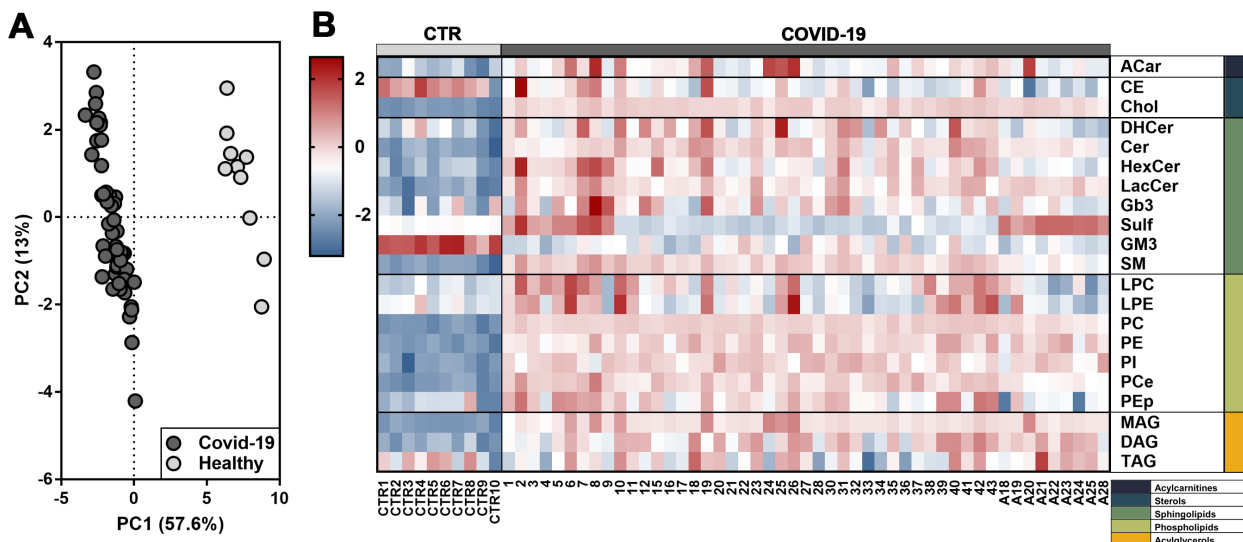

**Figure S1.** Serum lipid alteration related to symptomatic COVID-19 infection compared with healthy subjects. **(A)** Discriminant analysis (score plot) of the lipidome in function of the presence of symptomatic infection. The axes are ranked according to their importance in the group discrimination. In the x-axis, component 1 (PC1, 57.6%) represents the maximum of the separation that can be reached within these cluster and variables, whereas in the y-axis, component 2 (PC2, 13%) represents the direction that contains the most remaining variance. **(B)** Heatmap of the major serum lipids subclasses grouped per lipid categories coded by color on the left. The concentrations were autoscaled and log-transformed for visualization. The color-scale differentiates values as high (red), mean (white) and low (blue). Statistical significance was evaluated by unpaired t test. The concentrations of serum sulfatides, lysophosphatidylethanolamines and triacylglycerols were not statistically different between healthy subjects and COVID-positive patients.

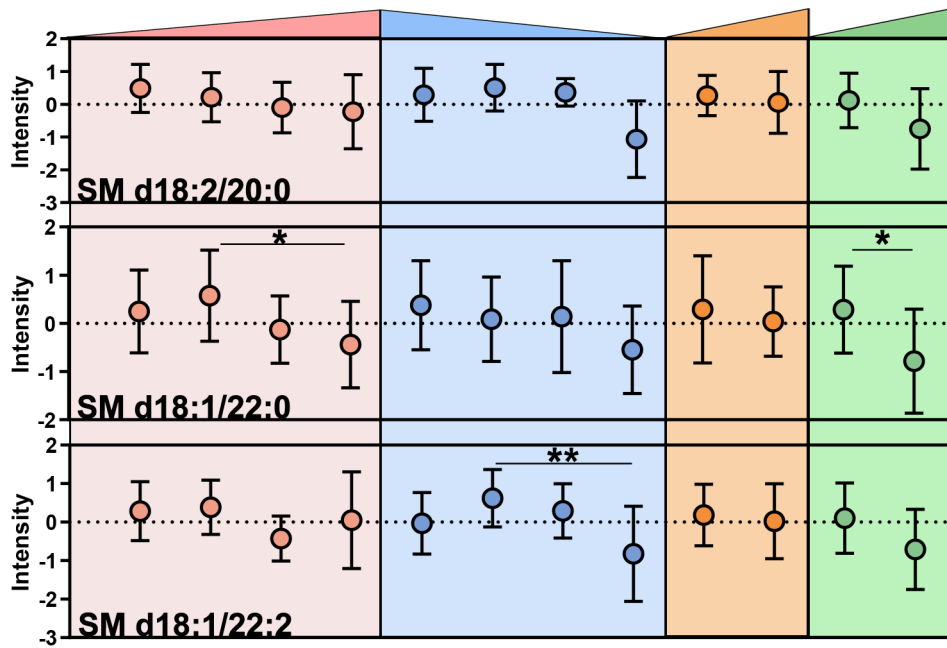

**Figure S2.** Common SM trend with either CRP (pink), P/F ratio (blue), D-dimer (orange) and creatinine (green) stratifications. Data are expressed as mean  $\pm$  SD. Statistical significance is evaluated by one-way ANOVA with Bonferroni post-hoc test. P value are schematized as follows: \* <0.05; \*\*<0.01; \*\*\* < 0.001; \*\*\*\*<0.0001.
